# Supplementary material for: The Abl pathway bifurcates to balance Enabled and Rac signaling in axon patterning in Drosophila
Source: Oxford University Press journal article supplement (doi:10.1242/dev.143776), 2017-01-13
Supplement: dev143776supp.pdf [file dev143776supp.pdf]

Kannan, Suppl. Fig 1

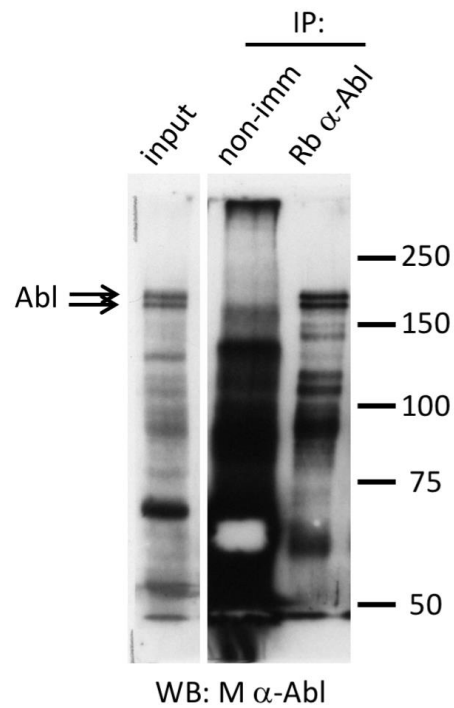

Supplementary Fig 1. Anti-Abl antibody immunoprecipitates Abl protein

Aliquots of the embryo lysate used for the experiment of Fig 2C were subjected to IP, PAGE and Western blotting. Molecular weight markers are indicated; non-imm indicates control non-immune IgG.

Suppl. Table 1: Quantitative data for Figure 5D, Structure/function dissection of Trio

| Background    | Genotype                                  | STI-571  | mean | SEM | N  |
|---------------|-------------------------------------------|----------|------|-----|----|
| Rac biosensor |                                           |          | 1.61 | .10 | 24 |
| Rac biosensor |                                           | +STI-571 | 1.08 | .08 | 24 |
| Rac biosensor | <i>UAS-Trio mGEF2</i>                     |          | 2.85 | .20 | 29 |
| Rac biosensor | <i>UAS-Trio mGEF2</i>                     | +STI-571 | 1.46 | .11 | 29 |
| Rac biosensor | <i>UAS-Trio mGEF2 Δ(NTD)</i>              |          | 2.39 | .19 | 31 |
| Rac biosensor | <i>UAS-Trio mGEF2 Δ(NTD)</i>              | +STI-571 | 2.34 | .23 | 31 |
| Rac biosensor | <i>UAS-Trio mGEF2 Δ(spectrin repeats)</i> |          | 1.58 | .10 | 35 |
| Rac biosensor | <i>UAS-Trio mGEF2 Δ(spectrin repeats)</i> | +STI-571 | .68  | .08 | 35 |
| Rac biosensor | <i>UAS-Trio mGEF2 Δ(NTD+spectrin)</i>     |          | 2.44 | .17 | 37 |
| Rac biosensor | <i>UAS-Trio mGEF2 Δ(NTD+spectrin)</i>     | +STI-571 | 1.80 | .12 | 37 |
| Rac biosensor | <i>UAS-Trio mGEF2 Δ(SH3)</i>              |          | 1.70 | .07 | 38 |
| Rac biosensor | <i>UAS-Trio mGEF2 Δ(SH3)</i>              | +STI-571 | .53  | .06 | 38 |
